# Supplementary material for: Genome-wide exploration of a pyroptosis-related gene module along with immune cell infiltration patterns in bronchopulmonary dysplasia
Source: Front Genet. 2023 Jan 4;13:1074723. doi: 10.3389/fgene.2022.1074723 (PMC9845403; doi:10.3389/fgene.2022.1074723)
Supplement: Supplementary file 1 [file Table2.XLSX]

## Sheet: Sheet1
Gene	conMean	BPDMean	pvalue	Type
ELANE	8.22957	8.76326	0.0134626	Up
CASP9	7.82759	7.92734	0.0170296	Up
NLRP6	6.71546	6.9493	0.00416455	Up
HMGB1	9.81386	9.69781	0.0230579	Down
TREM2	4.92511	5.03333	0.0059272	Up
CHMP7	9.29733	8.72069	2.99619e-07	Down
PLCG1	9.19098	8.72075	4.11293e-05	Down
DHX9	9.18884	9.01865	0.00198361	Down
TP53	9.16191	8.82844	5.577e-05	Down
CYCS	8.29192	8.08241	0.00157699	Down
NLRP3	8.18461	8.34939	0.0241526	Up
CHMP4A	7.91257	7.78211	0.0120617	Down
NLRP2	6.10887	5.78536	0.00646168	Down
CASP5	6.14948	6.78428	0.000971692	Up
CASP4	8.22118	8.42505	0.00508643	Up
NOD2	7.19834	7.51788	0.000273217	Up
PRKACA	8.86339	9.0111	0.0134628	Up
TNF	6.72193	6.93353	0.000802712	Up
IL1B	8.08017	8.61704	0.00782651	Up
NLRC4	8.53359	9.37167	3.48281e-07	Up
IRF2	9.26176	9.44213	0.000557918	Up
NAIP	10.1012	10.4968	0.00208045	Up
NLRP9	4.61926	4.71296	0.0440882	Up
GZMA	8.97068	8.60926	0.022425	Down
TIRAP	6.08037	6.24176	0.00734516	Up
