# Supplementary material for: Genome-wide exploration of a pyroptosis-related gene module along with immune cell infiltration patterns in bronchopulmonary dysplasia
Source: Front Genet. 2023 Jan 4;13:1074723. doi: 10.3389/fgene.2022.1074723 (PMC9845403; doi:10.3389/fgene.2022.1074723)
Supplement: Supplementary file 3 [file Table1.XLSX]

## Sheet: Sheet1
Pyroptosis genes
ELANE
IL6
CHMP3
BAX
CASP9
CHMP4C
CASP3
BAK1
CASP8
NLRP6
HMGB1
PYCARD
TREM2
CHMP4B
CHMP7
GSDMD
PLCG1
DHX9
GPX4
CHMP2A
NLRP1
TP63
AIM2
TP53
CYCS
GSDMB
NLRP3
CHMP4A
NLRP2
CASP5
CHMP6
SCAF11
IL18
CASP4
IL1A
GSDMA
NOD1
ZBP1
GSDMC
NOD2
PRKACA
TNF
IL1B
NLRC4
IRF2
GZMB
NAIP
IRF1
CASP1
NLRP9
NLRP7
GZMA
APIP
CHMP2B
PJVK
GSDME
TIRAP
